# Supplementary material
Source: HighWire-hosted journal article supplement (http://ajnr-stage2.highwire.org/highwire/filestream/182323/field_highwire_adjunct_files/0/16-00334.pdf)
Supplement: 16-00334.pdf [file 16-00334.pdf]

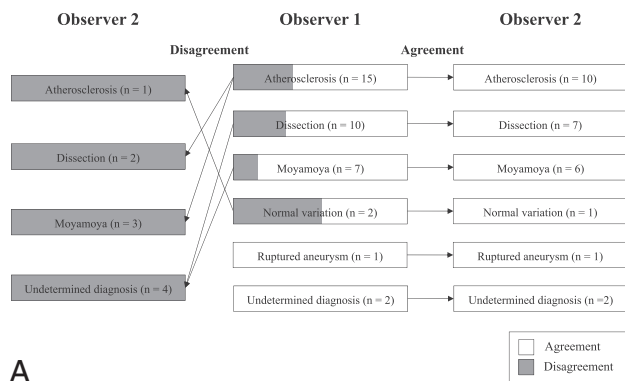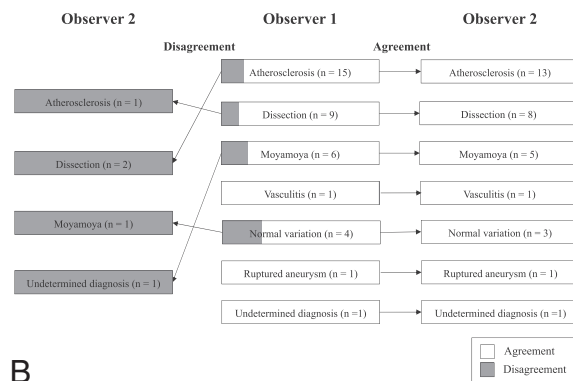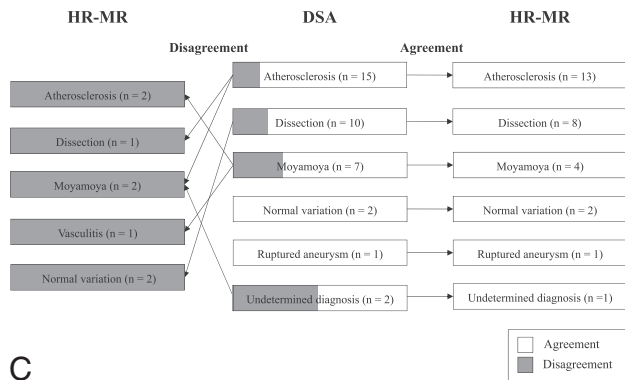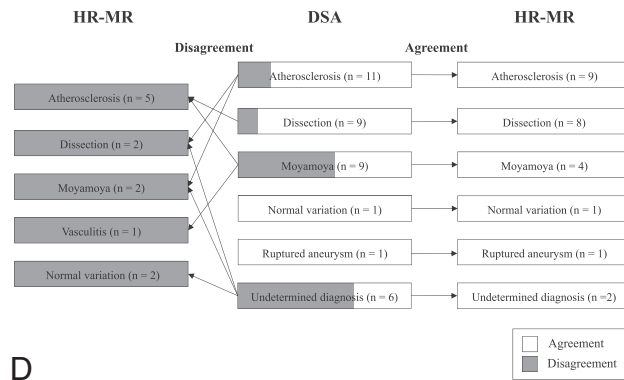

**ON-LINE FIGURE.** Diagnostic agreement and disagreement. *A*, Interobserver diagnostic agreement regarding DSA. *B*, Interobserver diagnostic agreement regarding HR-MR. *C*, Intermodality diagnostic agreement for observer 1. *D*, Intermodality diagnostic agreement for observer 2.
